# Supplementary material for: Modulation of Auger recombination via facet engineering in CsPbBr3 perovskite nanocrystals
Source: Royal Society of Chemistry journal article supplement (doi:10.1039/d4tc01251h), 2024-01-01
Supplement: d4tc01251h1.pdf [file d4tc01251h1.pdf]

***Electronic Supplementary Information (ESI) for***

**Modulation of Auger recombination via facet engineering in CsPbBr<sub>3</sub> perovskite nanocrystals**

Jiachen Zhang,<sup>‡a</sup> Shuyue Feng<sup>‡b</sup> and Qun Zhang<sup>a,b,c\*</sup>

<sup>a</sup>Hefei National Research Center for Physical Sciences at the Microscale, University of Science and Technology of China, Hefei, Anhui 230026, China.

<sup>b</sup>School of Chemistry and Materials Science, University of Science and Technology of China, Hefei, Anhui 230026, China.

<sup>c</sup>Hefei National Laboratory, University of Science and Technology of China, Hefei, Anhui 230088, China.

<sup>‡</sup>These authors contributed equally to this work.

**Corresponding Author**

\*E-mail: qunzh@ustc.edu.cn (Q. Zhang).

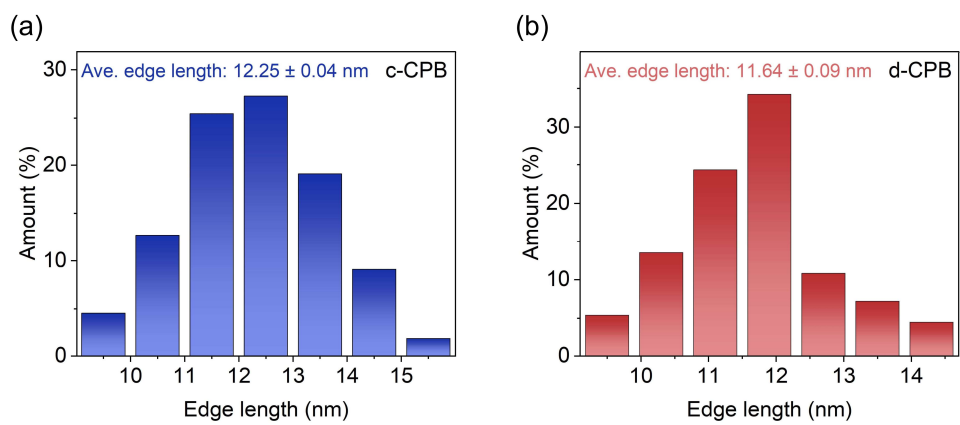

**Fig. S1** Size distribution histograms for (a) c-CPB and (b) d-CPB NCs from TEM images.

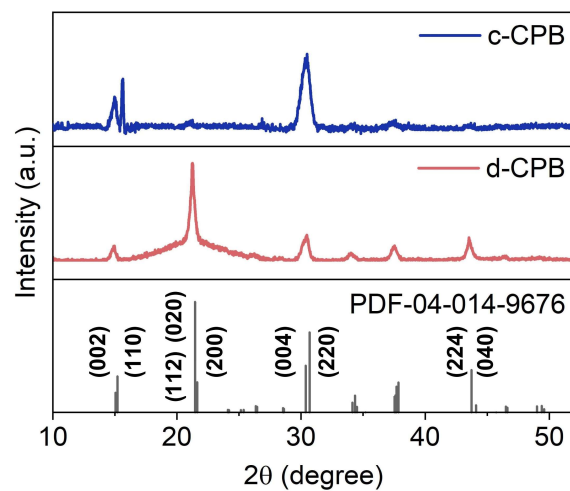

**Fig. S2** XRD patterns for c-CPB and d-CPB NCs. Compared to c-CPB NCs, d-CPB NCs exhibited much stronger signals at the diffraction angles corresponding to the (020), (112) and (200) facets, while much weaker signals at the diffraction angles corresponding to the (110) and (002) facets.

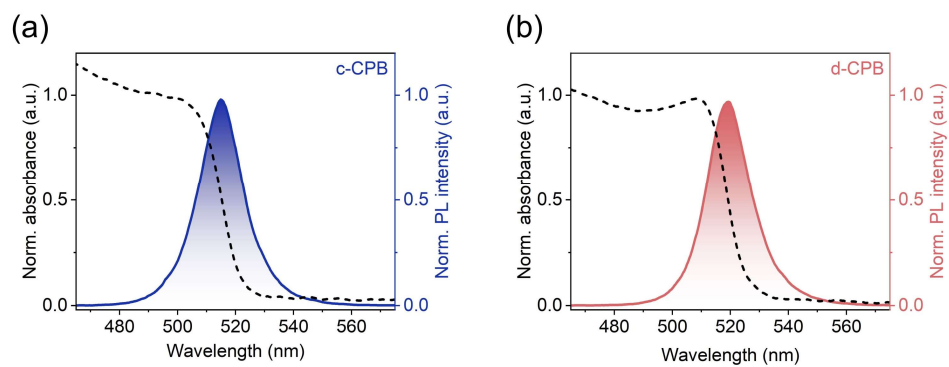

**Fig. S3** Normalized steady-state absorption and PL spectra (excited at 400 nm) for (a) c-CPB and (b) d-CPB NCs.

**Table S1** The fitting results (based on eqn 2 in the main text) for c-CPB and c-CPB NCs under investigation. The parameter  $B$  was fixed as the reciprocal of the PL quantum yield. The PL quantum yields were measured to be about 78% and 82% for c-CPB and d-CPB, respectively.

|              | $I_0$ | $A$              | $E_a$ (meV)    | $B$  | $E_b$ (meV)    |
|--------------|-------|------------------|----------------|------|----------------|
| <b>c-CPB</b> | 1     | $109.7 \pm 40.8$ | $13.4 \pm 1.5$ | 1.28 | $85.2 \pm 8.6$ |
| <b>d-CPB</b> | 1     | $19.0 \pm 7.6$   | $16.4 \pm 2.2$ | 1.22 | $60.4 \pm 7.0$ |

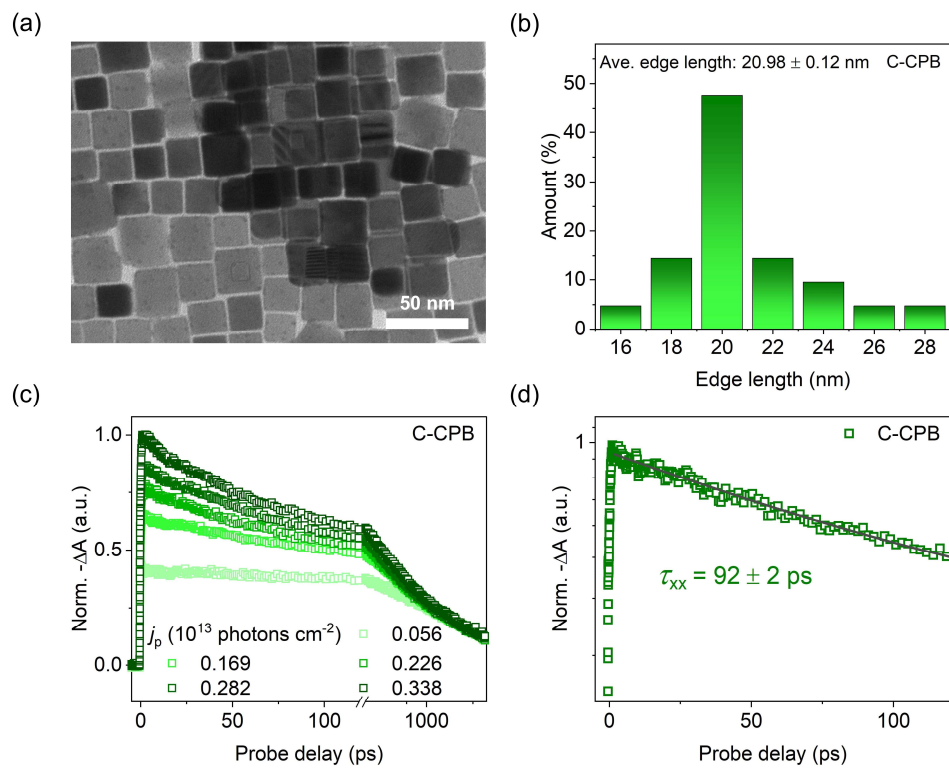

**Fig. S4** (a) Representative TEM image for C-CPB NCs. (b) Size distribution histogram for C-CPB NCs from TEM image. (c) Representative  $j_p$ -dependent fs-TA kinetic traces (late-time tail normalized) for C-CPB NCs. (d) Retrieval of biexciton lifetime ( $\tau_{xx}$ ) for C-CPB NCs based on the kinetics data shown in (c).

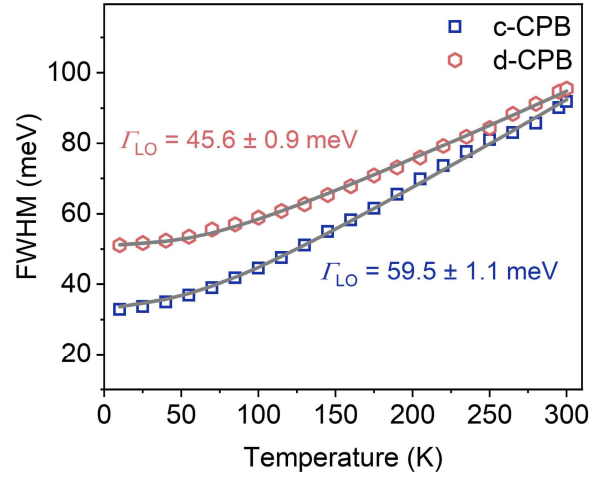

**Fig. S5** Temperature-dependent PL FWHM analysis for c-CPB and d-CPB NCs. The information about the charge carrier–LO-phonon coupling strength can be obtained with the aid of an analysis on the temperature-dependent FWHM,  $\Gamma(T)$ , according to  $\Gamma(T) = \Gamma_{\text{inh}} + \Gamma_{\text{LO}}[\exp(E_{\text{LO}}/k_{\text{B}}T) - 1]^{-1}$ ,<sup>S1-S3</sup> where the first term  $\Gamma_{\text{inh}}$  denotes temperature-independent inhomogeneous broadening due to the imperfections and/or disorder,  $\Gamma_{\text{LO}}$  denotes the charge carrier–LO-phonon scattering,  $E_{\text{LO}}$  denotes the LO-phonon energy ( $\sim 20$  meV)<sup>S4</sup> and  $k_{\text{B}}$  is the Boltzmann constant. The best-fit results are as follows:  $\Gamma_{\text{LO}} = 59.5 \pm 1.1$  meV and  $\Gamma_{\text{inh}} = 37.7 \pm 1.0$  meV for c-CPB;  $\Gamma_{\text{LO}} = 45.6 \pm 0.9$  meV and  $\Gamma_{\text{inh}} = 52.8 \pm 0.5$  meV for d-CPB.

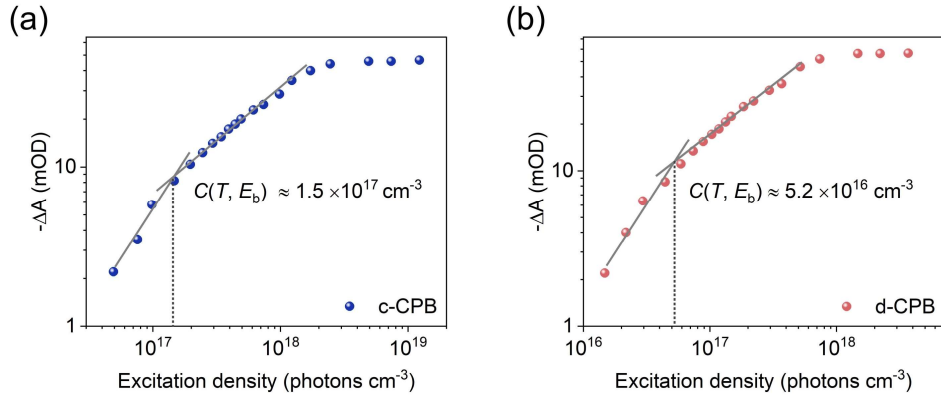

**Fig. S6** The fs-TA photobleaching signal (taken at 2–5 ps) as a function of excitation density for (a) c-CPB and (b) d-CPB NCs. The values of excitation density,  $n$ , can be determined according to  $n = j_p \sigma / V$ , where  $j_p$  denotes the pump fluence,  $\sigma$  denotes the absorption cross section and  $V$  denotes the NC volume. Following the treatment described in the literature,<sup>55</sup> we can readily retrieve the excited-state  $E_b$  values of interest according to  $C(T, E_b) = (2\pi\mu k_B T / h^2)^{3/2} \exp(-E_b / k_B T)$ , where  $\mu$  denotes the reduced mass according to  $\mu = (1/m_e^* + 1/m_h^*)^{-1}$ ,  $k_B$  is the Boltzmann constant,  $h$  is the Planck constant and  $T = 300$  K. The  $C(T, E_b)$  positions can be determined simply by intersecting the quadratic and linear fitting lines as indicated in the plots. The obtained excited-state  $E_b$  values are  $\sim 30.2$  meV for c-CPB and  $\sim 57.5$  meV for d-CPB.



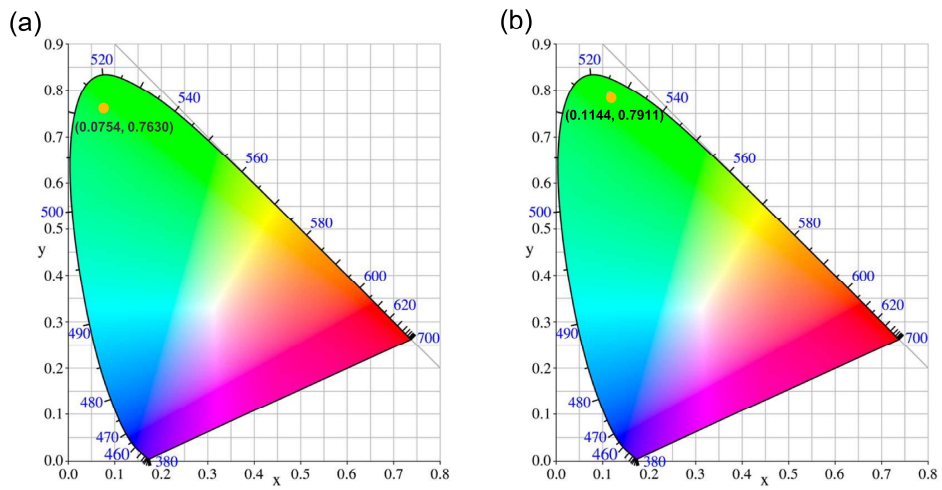

**Fig. S7** Commission Internationale de l'Eclairage (CIE) colour coordinates for (a) c-CPB and (b) d-CPB NCs-based LEDs at a driving voltage of 4.0 V.

## References

- (S1) A. D. Wright, C. Verdi, R. L. Milot, G. E. Eperon, M. A. Pérez-Osorio, H. J. Snaith, F. Giustino, M. B. Johnston and L. M. Herz, *Nat. Commun.*, 2016, **7**, 11755.
- (S2) J. Ramade, L. M. Andriambariarijaona, V. Steinmetz, N. Goubet, L. Legrand, T. Barisien, F. Bernardot, C. Testelin, E. Lhuillier, A. Bramati and M. Chamarro, *Appl. Phys. Lett.*, 2018, **112**, 072104.
- (S3) Q. Han, W. Wu, W. Liu, Q. Yang and Y. Yang, *J. Lumin.*, 2018, **198**, 350–356.
- (S4) H. Li, J. Zhang and Q. Zhang, *J. Chem. Phys.*, 2023, **159**, 214707.
- (S5) W. Wang, Y. Li, X. Wang, Y. Lv, S. Wang, K. Wang, Y. Shi, L. Xiao, Z. Chen and Q. Gong, *Phys. Rev. B*, 2016, **94**, 140302(R).
